# Supplementary material for: Worldwide Prevalence of mcr-mediated Colistin-Resistance Escherichia coli in Isolates of Clinical Samples, Healthy Humans, and Livestock—A Systematic Review and Meta-Analysis
Source: MDPI journal article supplement (doi:10.3390/pathogens11060659), 2022-06-08
Supplement: s1 [file s1]

## Supplementary tables

**Table S1.** Detail of studies of Colistin-resistant *E. coli* mediated by *mcr* genes in chicken's samples included in the meta-analysis.

| Author                                                | Region | Microbiological methodology | Molecular methodology | N    | <i>E. coli</i> prevalence | <i>mcr</i> genes |
|-------------------------------------------------------|--------|-----------------------------|-----------------------|------|---------------------------|------------------|
| <a href="#">Joshi, et al. (2019) [92]</a>             | AFRICA | BMD/MIC                     | PCR                   | 324  | 118                       | 27               |
| <a href="#">Subedi, et al. (2018) [93]</a>            | AFRICA | disk diffusion              | PCR                   | 50   | 50                        | 25               |
| <a href="#">Maamar, et al. (2018) [94]</a>            | AFRICA | BMD/MIC                     | PCR                   | 137  | 48                        | 2                |
| <a href="#">Moawad, et al. (2018) [95]</a>            | AFRICA | E-test                      | PCR                   | 576  | 63                        | 5                |
| <a href="#">Perreten, et al. (2016) [96]</a>          | AFRICA | BMD/MIC                     | PCR                   | 4934 | 797                       | 19               |
| <a href="#">Hassen, Abbassi, et al. (2019) [97]</a>   | AFRICA | disk diffusion              | PCR                   | 333  | 94                        | 52               |
| <a href="#">Joshi, Thummeepak, et al. (2019) [98]</a> | AFRICA | disk diffusion              | PCR                   | 180  | 60                        | 16               |
| <a href="#">Atterby, et al. (2019) [99]</a>           | AFRICA | disk diffusion              | PCR                   | 456  | 129                       | 4                |
| <a href="#">Hassen, et al [100]</a>                   | AFRICA | BMD/MIC                     | PCR                   | 286  | 64                        | 34               |
| <a href="#">Muktan, et al [101]</a>                   | AFRICA | BMD/MIC                     | PCR                   | 240  | 76                        | 21               |
| <a href="#">Dhaouadi, et al [102]</a>                 | AFRICA | BMD/MIC                     | PCR                   | 100  | 50                        | 7                |
| <a href="#">Bista, et al [103]</a>                    | AFRICA | BMD/MIC                     | PCR                   | 270  | 144                       | 18               |
| <a href="#">Ngbede, et al [104]</a>                   | AFRICA | BMD/MIC                     | PCR                   | 435  | 250                       | 17               |

|                                                      |         |                   |                 |      |      |     |
|------------------------------------------------------|---------|-------------------|-----------------|------|------|-----|
| <a href="#">Büdel, et al [105]</a>                   | AFRICA  | BMD/MIC           | PCR             | 144  | 69   | 16  |
| <a href="#">Dominguez, et al. (2018) [106]</a>       | AMERICA | disk diffusion    | PCR             | 129  | 41   | 31  |
| <a href="#">Dominguez, et al. (2017) [107]</a>       | AMERICA | BMD/MIC           | PCR             | 304  | 304  | 149 |
| <a href="#">Monte, et al. (2017) [108]</a>           | AMERICA | disk diffusion    | PCR             | 41   | 8    | 8   |
| <a href="#">Fernandes, et al. (2016) [109]</a>       | AMERICA | BMD/MIC           | PCR             | 343  | 343  | 10  |
| <a href="#">Vounba, et al. (2019) [110]</a>          | AMERICA | BMD/MIC           | PCR             | 327  | 327  | 11  |
| <a href="#">Yamamoto, et al. (2019) [111]</a>        | AMERICA | E-test            | PCR             | 66   | 31   | 15  |
| <a href="#">Saidenberg, et al [112]</a>              | AMERICA | BMD/MIC           | PCR             | 64   | 64   | 2   |
| <a href="#">Coppola, et al [113]</a>                 | AMERICA | BMD/MIC           | PCR             | 200  | 200  | 1   |
| <a href="#">Eltai, et al. (2018) [114]</a>           | ASIA    | E-test            | PCR             | 172  | 90   | 14  |
| <a href="#">Wu, et al. (2018) [115]</a>              | ASIA    | BMD/MIC           | PCR             | 821  | 341  | 44  |
| <a href="#">Wang, Wang, et al. (2018) [116]</a>      | ASIA    | BMD/MIC           | PCR/ sequencing | 102  | 52   | 22  |
| <a href="#">Hmede, et al. (2018) [117]</a>           | ASIA    | BMD/MIC           | PCR             | 93   | 90   | 88  |
| <a href="#">Ohsaki, et al. (2017) [118]</a>          | ASIA    | BMD/MIC           | PCR             | 70   | 70   | 1   |
| <a href="#">Lima Barbieri, et al. (2017) [119]</a>   | ASIA    | BMD/MIC           | PCR             | 980  | 980  | 12  |
| <a href="#">Yang, et al. (2017) [120]</a>            | ASIA    | BMD/MIC           | PCR             | 4934 | 4934 | 19  |
| <a href="#">Wang, Zhang, Li, et al. (2017) [121]</a> | ASIA    | agar dilution/MIC | PCR             | 245  | 161  | 37  |

|                                                    |      |                   |     |      |      |     |
|----------------------------------------------------|------|-------------------|-----|------|------|-----|
| <a href="#">Liu BT, Song, et al. (2017) [122]</a>  | ASIA | agar dilution/MIC | PCR | 78   | 78   | 53  |
| <a href="#">Nakayama, et al. (2017) [123]</a>      | ASIA | E-test            | PCR | 30   | 7    | 2   |
| <a href="#">Shen, Wang, et al. (2016) [124]</a>    | ASIA | BMD/MIC           | PCR | 1611 | 1611 | 104 |
| <a href="#">Lv, Mohsin, et al. (2018) [125]</a>    | ASIA | E-test            | PCR | 100  | 100  | 8   |
| <a href="#">Song, Yu, et al. (2019) [126]</a>      | ASIA | disk diffusion    | PCR | 400  | 130  | 75  |
| <a href="#">Zhuge, et al. (2019) [127]</a>         | ASIA | BMD/MIC           | PCR | 1718 | 1360 | 172 |
| <a href="#">Li, Sun, et al. (2019) [128]</a>       | ASIA | BMD/MIC           | PCR | 1273 | 962  | 962 |
| <a href="#">Liu, Liao, et al. (2018) [129]</a>     | ASIA | BMD/MIC           | PCR | 1723 | 1723 | 60  |
| <a href="#">Zhang, et al. (2019) [130]</a>         | ASIA | agar dilution/MIC | PCR | 2199 | 1766 | 388 |
| <a href="#">Liu, Song, et al. (2019) [131]</a>     | ASIA | agar dilution/MIC | PCR | 493  | 342  | 102 |
| <a href="#">Yamaguchi, et al. (2018) [132]</a>     | ASIA | agar dilution/MIC | PCR | 330  | 261  | 56  |
| <a href="#">Yassin, et al. (2017) [133]</a>        | ASIA | BMD/MIC           | PCR | 757  | 624  | 13  |
| <a href="#">Nishino, et al. (2017) [134]</a>       | ASIA | agar dilution/MIC | PCR | 87   | 87   | 8   |
| <a href="#">Kawanishi, et al. (2016) [135]</a>     | ASIA | agar dilution/MIC | PCR | 4513 | 4513 | 14  |
| <a href="#">Nguyen, et al. (2016) [136]</a>        | ASIA | E-test            | PCR | 180  | 180  | 20  |
| <a href="#">Malhotra Kumar, et al (2016) [137]</a> | ASIA | BMD/MIC           | PCR | 24   | 24   | 2   |
| <a href="#">Oh SS, Song, et al. (2019) [138]</a>   | ASIA | BMD/MIC           | PCR | 93   | 93   | 2   |

|                                                 |      |                   |     |      |      |     |
|-------------------------------------------------|------|-------------------|-----|------|------|-----|
| <a href="#">Zhang, et al. (2019) [139]</a>      | ASIA | BMD/MIC           | PCR | 207  | 207  | 1   |
| <a href="#">Kawahara, et al. (2019) [140]</a>   | ASIA | BMD/MIC           | PCR | 72   | 72   | 35  |
| <a href="#">Gao, et al (2019) [141]</a>         | ASIA | agar dilution/MIC | PCR | 24   | 24   | 4   |
| <a href="#">Vinh Trung, et al. (2017) [142]</a> | ASIA | E-test            | PCR | 714  | 200  | 10  |
| <a href="#">Bui, et al. (2018) [143]</a>        | ASIA | disk diffusion    | PCR | 149  | 124  | 10  |
| <a href="#">Chen, Zhao, et al. (2017) [144]</a> | ASIA | BMD/MIC           | PCR | 2330 | 1709 | 45  |
| <a href="#">Aklilu, Raman [145]</a>             | ASIA | BMD/MIC           | PCR | 50   | 23   | 12  |
| <a href="#">Song, Yu, et al [146]</a>           | ASIA | BMD/MIC           | PCR | 400  | 130  | 75  |
| <a href="#">Amin, et al [147]</a>               | ASIA | BMD/MIC           | PCR | 104  | 104  | 14  |
| <a href="#">Dutta, et al [148]</a>              | ASIA | BMD/MIC           | PCR | 250  | 133  | 33  |
| <a href="#">Xiangkai , et al [149]</a>          | ASIA | BMD/MIC           | PCR | 489  | 489  | 61  |
| <a href="#">Zhao, et al [150]</a>               | ASIA | BMD/MIC           | PCR | 722  | 668  | 102 |
| <a href="#">Oh, et al [151]</a>                 | ASIA | BMD/MIC           | PCR | 34   | 2    | 2   |
| <a href="#">Kim, et al [152]</a>                | ASIA | BMD/MIC           | PCR | 818  | 543  | 8   |
| <a href="#">Rafique, et al [153]</a>            | ASIA | BMD/MIC           | PCR | 1219 | 92   | 13  |
| <a href="#">Ahmed, et al [154]</a>              | ASIA | BMD/MIC           | PCR | 1200 | 1200 | 305 |
| <a href="#">Azam, et al [155]</a>               | ASIA | BMD/MIC           | PCR | 75   | 75   | 29  |

|                                                      |        |                   |                 |       |       |     |
|------------------------------------------------------|--------|-------------------|-----------------|-------|-------|-----|
| <a href="#">Afridi, et al [156]</a>                  | [ASIA  | BMD/MIC           | PCR             | 410   | 242   | 1   |
| <a href="#">Liu, et al [157]</a>                     | ASIA   | BMD/MIC           | PCR             | 707   | 168   | 41  |
| <a href="#">Javed, et al [158]</a>                   | ASIA   | BMD/MIC           | PCR             | 630   | 126   | 90  |
| <a href="#">Yu, et al [159]</a>                      | ASIA   | BMD/MIC           | PCR             | 100   | 83    | 53  |
| <a href="#">Sadek, et al [160]</a>                   | ASIA   | BMD/MIC           | PCR             | 345   | 19    | 19  |
| <a href="#">Zurfluh, et al. (2017) [161]</a>         | EUROPE | BMD/MIC           | PCR             | 1144  | 3     | 3   |
| <a href="#">Pietsch, et al. (2018) [162]</a>         | EUROPE | BMD/MIC           | PCR             | 164   | 164   | 8   |
| <a href="#">El Garch, et al. (2018) [163]</a>        | EUROPE | BMD/MIC           | PCR             | 11980 | 10206 | 45  |
| <a href="#">Alba, et al. (2018) [164]</a>            | EUROPE | BMD/MIC           | PCR             | 604   | 338   | 8   |
| <a href="#">Irrgang, et al. (2016) [165]</a>         | EUROPE | BMD/MIC           | PCR             | 10609 | 10609 | 299 |
| <a href="#">Perrin-Guyomard, et al. (2016) [166]</a> | EUROPE | BMD/MIC           | PCR             | 1450  | 1450  | 7   |
| <a href="#">Zajac, et al. (2019) [167]</a>           | EUROPE | BMD/MIC           | PCR             | 5878  | 180   | 13  |
| <a href="#">Zurfluh, et al. (2017) [168]</a>         | EUROPE | BMD/MIC           | PCR             | 320   | 320   | 2   |
| <a href="#">Dona, et al. (2017) [169]</a>            | EUROPE | BMD/MIC           | PCR             | 545   | 545   | 6   |
| <a href="#">Doumith, et al. (2016) [170]</a>         | EUROPE | agar dilution/MIC | PCR/ sequencing | 2625  | 1739  | 2   |
| <a href="#">Maciuca, et al. (2019) [171]</a>         | EUROPE | disk diffusion    | PCR             | 107   | 107   | 11  |
| <a href="#">Adiguzel, et al [172]</a>                | EUROPE | BMD/MIC           | PCR             | 225   | 225   | 1   |

|                                          |        |         |     |     |     |    |
|------------------------------------------|--------|---------|-----|-----|-----|----|
| <a href="#">Majewski, et al [173]</a>    | EUROPE | BMD/MIC | PCR | 158 | 25  | 25 |
| <a href="#">Savin, et al [174]</a>       | EUROPE | BMD/MIC | PCR | 82  | 82  | 20 |
| <a href="#">Mesa-Varona, et al [175]</a> | EUROPE | BMD/MIC | PCR | 407 | 407 | 23 |
| <a href="#">Pesciaroli, et al [176]</a>  | EUROPE | BMD/MIC | PCR | 825 | 15  | 12 |

BMD: Broth Micro-dilution; MIC: Minimum Inhibitory Concentration; PCR: Polymerase Chain Reaction; CR E. coli: Colistin-Resistant E. coli;

\*Studies including other hosts but also healthy humans. The table shows the data only for isolates from humans.

**Table S2. Detail of studies of colistin-resistant *E. coli* mediated by *mcr* genes in pigs included in the meta-analysis.**

| Author                                       | Region  | Microbiological methodology | Molecular methodology | N   | <i>E. coli</i> prevalence | <i>mcr</i> genes |
|----------------------------------------------|---------|-----------------------------|-----------------------|-----|---------------------------|------------------|
| <a href="#">Atterby, et al (b). (2019)*</a>  | Africa  | disc diffusion              | PCR                   | 456 | 129                       | 4                |
| <a href="#">Ngbede, et al</a>                | Africa  | BMD/MIC                     | PCR                   | 220 | 65                        | 10               |
| <a href="#">Kieffer, et al. (2018) [177]</a> | America | BMD/MIC                     | PCR                   | 126 | 126                       | 1                |
| <a href="#">Yamamoto, et al (b). (2019)*</a> | America | E-test                      | PCR                   | 66  | 31                        | 16               |

|                                                        |         |                   |                         |      |      |     |
|--------------------------------------------------------|---------|-------------------|-------------------------|------|------|-----|
| <a href="#">Meinersmann, et al (b). (2017)* [178]</a>  | America | Vitek-2           | PCR                     | 801  | 801  | 2   |
| <a href="#">Delgado Blas, et al (b). (2016)* [179]</a> | America | BMD/MIC           | PCR / sequencing SANGER | 49   | 49   | 1   |
| <a href="#">Coppola, et al</a>                         | America | BMD/MIC           | PCR                     | 153  | 153  | 8   |
| <a href="#">Wang, et al. (2019) [180]</a>              | Asia    | agar dilution/MIC | PCR                     | 30   | 25   | 25  |
| <a href="#">Dandachi, et al. (2019) [181]</a>          | Asia    | disc diffusion    | PCR                     | 243  | 105  | 27  |
| <a href="#">Li, et al. (2018) [182]</a>                | Asia    | agar dilution/MIC | PCR                     | 417  | 417  | 61  |
| <a href="#">Tong, et al. (2018) [183]</a>              | Asia    | BMD/MIC           | PCR                     | 600  | 457  | 152 |
| <a href="#">Li, Liu, et al. (2018) [184]</a>           | Asia    | BMD/MIC           | PCR                     | 306  | 306  | 78  |
| <a href="#">Strom, et al. (2018) [185]</a>             | Asia    | BMD/MIC           | PCR                     | 261  | 110  | 22  |
| <a href="#">Li , Xie, et al. (2017) [186]</a>          | Asia    | agar dilution/MIC | PCR                     | 97   | 97   | 35  |
| <a href="#">Kong, Lei, et al. (2017) [187]</a>         | Asia    | agar dilution/MIC | PCR                     | 105  | 105  | 16  |
| <a href="#">Wang, Li Z,?Lin, et al. (2016) [188]</a>   | Asia    | BMD/MIC           | PCR                     | 1026 | 1026 | 302 |
| <a href="#">Kusumoto, Ogura, et al. (2016) [24]</a>    | Asia    | agar dilution/MIC | PCR                     | 967  | 684  | 90  |
| <a href="#">Peng, et al. (2019) [189]</a>              | Asia    | BMD/MIC           | PCR                     | 538  | 538  | 8   |
| <a href="#">Do, Park, et al. (2019) [190]</a>          | Asia    | BMD/MIC           | PCR                     | 364  | 364  | 9   |
| <a href="#">Shafiq, et al. (2019) [191]</a>            | Asia    | BMD/MIC           | PCR                     | 432  | 275  | 197 |
| <a href="#">Fukuda, et al. (2018) [192]</a>            | Asia    | agar dilution/MIC | PCR                     | 676  | 676  | 81  |

|                                                       |        |                   |     |      |      |     |
|-------------------------------------------------------|--------|-------------------|-----|------|------|-----|
| <a href="#">Lai, et al (b). (2018)* [193]</a>         | Asia   | BMD/MIC           | PCR | 702  | 140  | 12  |
| <a href="#">Liu, Liao, et al (b). (2018)*</a>         | Asia   | BMD/MIC           | PCR | 1723 | 1723 | 450 |
| <a href="#">Zhang, et al (b). (2019)*</a>             | Asia   | agar dilution/MIC | PCR | 2199 | 1766 | 303 |
| <a href="#">Liu, Song, et al (b). (2019)*</a>         | Asia   | agar dilution/MIC | PCR | 493  | 342  | 38  |
| <a href="#">Belaynehe, Shin, et al. (2018)* [194]</a> | Asia   | BMD/MIC           | PCR | 636  | 636  | 5   |
| <a href="#">Yamaguchi, et al (b). (2018)*</a>         | Asia   | agar dilution/MIC | PCR | 330  | 261  | 3   |
| <a href="#">Yassin, et al (b). (2017)*</a>            | Asia   | BMD/MIC           | PCR | 757  | 624  | 1   |
| <a href="#">Nishino, et al (b). (2017)*</a>           | Asia   | agar dilution/MIC | PCR | 87   | 87   | 1   |
| <a href="#">Kawanishi, et al (b). (2016)*</a>         | Asia   | agar dilution/MIC | PCR | 4513 | 4513 | 20  |
| <a href="#">Nguyen, et al (b). (2016)*</a>            | Asia   | E-test            | PCR | 180  | 180  | 17  |
| <a href="#">Malhotra Kumar, et al (b). (2016)*</a>    | Asia   | BMD/MIC           | PCR | 24   | 24   | 7   |
| <a href="#">Oh SS, Song, et al (b). (2019)*</a>       | Asia   | BMD/MIC           | PCR | 93   | 93   | 4   |
| <a href="#">Zhang, et al (b). (2019)*</a>             | Asia   | BMD/MIC           | PCR | 207  | 207  | 1   |
| <a href="#">Kawahara, et al (b). (2019)*</a>          | Asia   | BMD/MIC           | PCR | 72   | 72   | 34  |
| <a href="#">Yanzheng, et al (b). (2019)*</a>          | Asia   | agar dilution/MIC | PCR | 24   | 24   | 12  |
| <a href="#">Chen, Zhao, et al (b). (2017)*</a>        | Asia   | BMD/MIC           | PCR | 2330 | 1709 | 2   |
| <a href="#">Duggett, et al. (2018) [195]</a>          | Europe | BMD/MIC           | PCR | 349  | 349  | 224 |



|                                                              |        |                   |                 |      |      |     |
|--------------------------------------------------------------|--------|-------------------|-----------------|------|------|-----|
| <a href="#">Garcia, et al. (2018) [196]</a>                  | Europe | MicroScan         | PCR             | 186  | 186  | 140 |
| <a href="#">Randall, et al. (2018) [197]</a>                 | Europe | BMD/MIC           | PCR/ sequencing | 275  | 275  | 199 |
| <a href="#">Delannoy, et al. (2017) [198]</a>                | Europe | BMD/MIC           | PCR             | 99   | 99   | 33  |
| <a href="#">Kieffer, et al. (2017) [199]</a>                 | Europe | disc diffusion    | PCR             | 100  | 90   | 90  |
| <a href="#">Carattoli, et al. (2017) [200]</a>               | Europe | agar dilution/MIC | PCR             | 125  | 125  | 46  |
| <a href="#">Hille, et al. (2018) [201]</a>                   | Europe | BMD/MIC           | PCR             | 127  | 89   | 11  |
| <a href="#">Curcio, et al. (2017) [202]</a>                  | Europe | disc diffusion    | PCR             | 51   | 51   | 37  |
| <a href="#">Roschanski, et al. (2017) [203]</a>              | Europe | BMD/MIC           | PCR             | 436  | 43   | 43  |
| <a href="#">Duggett, Sayers, et al. (2017) [204]</a>         | Europe | agar dilution/MIC | PCR             | 1109 | 590  | 2   |
| <a href="#">El Garch, Sauget, et al. (2017) [205]</a>        | Europe | disc diffusion    | PCR             | 6274 | 6274 | 218 |
| <a href="#">Bai, Hurley, et al. (2016) [206]</a>             | Europe | disc diffusion    | PCR             | 1003 | 93   | 10  |
| <a href="#">Xavier, Lammens, et al. (2016) [207]</a>         | Europe | BMD/MIC           | PCR             | 53   | 53   | 11  |
| <a href="#">Xavier, Lammens, Butaye, et al. (2016) [208]</a> | Europe | BMD/MIC           | PCR             | 53   | 53   | 7   |
| <a href="#">Quesada, et al. (2016) [209]</a>                 | Europe | BMD/MIC           | PCR             | 439  | 439  | 2   |
| <a href="#">Chabou, et al. (2019) [210]</a>                  | Europe | Sensititre™       | PCR             | 120  | 25   | 25  |
| <a href="#">García Menino, et al. (2019) [211]</a>           | Europe | disc diffusion    | PCR             | 499  | 35   | 35  |
| <a href="#">Fournier, et al. (2019) [212]</a>                | Europe | disc diffusion    | PCR             | 102  | 62   | 9   |

|                                                        |        |                   |     |       |       |    |
|--------------------------------------------------------|--------|-------------------|-----|-------|-------|----|
| <a href="#">Kieffer, Nordmann, et al. (2019) [213]</a> | Europe | BMD/MIC           | PCR | 147   | 147   | 23 |
| <a href="#">Magistrali, et al. (2018) [214]</a>        | Europe | BMD/MIC           | PCR | 74    | 74    | 30 |
| <a href="#">Clemente, et al. (2019) [215]</a>          | Europe | agar dilution/MIC | PCR | 824   | 824   | 42 |
| <a href="#">El Garch, et al (b). (2018)*</a>           | Europe | BMD/MIC           | PCR | 11980 | 10206 | 25 |
| <a href="#">Alba, et al (b). (2018)*</a>               | Europe | BMD/MIC           | PCR | 604   | 338   | 1  |
| <a href="#">Irrgang, et al (b). (2016)*</a>            | Europe | BMD/MIC           | PCR | 10609 | 10609 | 25 |
| <a href="#">Perrin Guyomard, et al (b). (2016)*</a>    | Europe | BMD/MIC           | PCR | 1450  | 1450  | 2  |
| <a href="#">Zajac, et al (b). (2019)*</a>              | Europe | BMD/MIC           | PCR | 5878  | 180   | 1  |
| <a href="#">Hallenberg, et al (b). (2019) *[216]</a>   | Europe | BMD/MIC           | PCR | 261   | 261   | 52 |

BMD: Broth Micro-dilution; MIC: Minimum Inhibitory Concentration; PCR: Polymerase Chain Reaction; CR *E. coli*: Colistin-Resistant *E. coli*; \*Studies including other hosts but also swine. The table shows the data only for isolates from pigs.

**Table S3. Detail of studies of Colistin-resistant *E. coli* mediated by *mcr* genes in healthy humans included in the meta-analysis.**

| Author                                                  | Region  | Microbiological methodology | Molecular methodology   | N    | <i>E. coli</i> prevalence | <i>mcr</i> genes |
|---------------------------------------------------------|---------|-----------------------------|-------------------------|------|---------------------------|------------------|
| <a href="#">Budel, et al. (2019) [217]</a>              | Africa  | BMD/MIC                     | PCR                     | 59   | 20                        | 10               |
| <a href="#">Atterby, et al. (a) (2019)*</a>             | Africa  | disc diffusion              | PCR                     | 456  | 129                       | 1                |
| <a href="#">Ngbede, et al</a>                           | Africa  | BMD/MIC                     | PCR                     | 60   | 60                        | 8                |
| <a href="#">Kamweli Aworh, et al [218]</a>              | Africa  | BMD/MIC                     | PCR                     | 110  | 47                        | 3                |
| <a href="#">Giani, et al. (2018) [219]</a>              | America | BMD/MIC                     | PCR                     | 337  | 170                       | 129              |
| <a href="#">Delgado Blas, et al. (a) (2016)* (88)</a>   | America | BMD/MIC                     | PCR / SANGER sequencing | 49   | 49                        | 1                |
| <a href="#">Berglund, et al. (2018) [220]</a>           | Asia    | BMD/MIC                     | PCR                     | 1000 | 706                       | 25               |
| <a href="#">Yamamoto, Kawahara, et al. (2018) [221]</a> | Asia    | BMD/MIC                     | PCR                     | 98   | 83                        | 68               |
| <a href="#">Bi, Berglund, et al. (2017) [222]</a>       | Asia    | E-test                      | PCR                     | 1000 | 411                       | 20               |
| <a href="#">Kawahara, et al. (2019) [223]</a>           | Asia    | disc diffusion              | PCR                     | 612  | 451                       | 31               |
| <a href="#">Lai, et al. (a) (2018)*</a>                 | Asia    | BMD/MIC                     | PCR                     | 702  | 140                       | 12               |
| <a href="#">Trung, et al. (a) (2017)*</a>               | Asia    | E-test                      | PCR                     | 714  | 200                       | 2                |
| <a href="#">Bui, et al. (a) (2018)*</a>                 | Asia    | disc diffusion              | PCR                     | 149  | 124                       | 1                |
| <a href="#">Chen, Zhao, et al. (a) (2017)*</a>          | Asia    | BMD/MIC                     | PCR                     | 2330 | 1709                      | 3                |

|                                                       |        |                   |                         |       |       |    |
|-------------------------------------------------------|--------|-------------------|-------------------------|-------|-------|----|
| <a href="#">Johura, et al [224]</a>                   | Asia   | BMD/MIC           | PCR                     | 20    | 20    | 3  |
| <a href="#">Yamaguchi, et al [225]</a>                | Asia   | BMD/MIC           | PCR                     | 98    | 57    | 57 |
| <a href="#">Fukuda, et al [226]</a>                   | Asia   | BMD/MIC           | PCR                     | 517   | 517   | 1  |
| <a href="#">Del Bianco, et al. (2018) [227]</a>       | Europe | Vitek-2           | PCR                     | 19053 | 12441 | 70 |
| <a href="#">Dona, Bernasconi, et al. (2017)</a>       | Europe | SensititreTM      | PCR                     | 26    | 26    | 3  |
| <a href="#">Leangapichart, et al. (2016) [228]</a>    | Europe | E-test            | PCR                     | 23    | 10    | 10 |
| <a href="#">Vading, et al. (2016) [229]</a>           | Europe | Vitek-2           | PCR                     | 376   | 65    | 1  |
| <a href="#">Hasman, Hammerum, et al. (2015) [230]</a> | Europe | BMD/MIC           | PCR                     | 920   | 920   | 57 |
| <a href="#">Zogg, et al. (2016) [231]</a>             | Europe | BMD/MIC           | PCR                     | 80    | 40    | 2  |
| <a href="#">Stoesser, et al. (a) (2016) *[232]</a>    | Europe | BMD/MIC           | PCR                     | 1100  | 1100  | 1  |
| <a href="#">Zurfluh, et al. (a) (2017)*</a>           | Europe | BMD/MIC           | PCR                     | 320   | 320   | 3  |
| <a href="#">Dona, et al. (a) (2017)*</a>              | Europe | BMD/MIC           | PCR                     | 545   | 545   | 3  |
| <a href="#">Doumith, et al. (a) (2016)*</a>           | Europe | agar dilution/MIC | PCR / SANGER sequencing | 2625  | 1739  | 13 |

BMD: Broth Micro-dilution; MIC: Minimum Inhibitory Concentration; PCR: Polymerase Chain Reaction; CR *E. coli*: Colistin-Resistant *E. coli*; \*Studies including other hosts but also healthy humans. The table shows the data only for isolates from humans.

**Table S4. Detail of studies of Colistin-resistant *E. coli* mediated by *mcr* genes in clinical samples included in the meta-analysis.**

| Author                                        | Region  | Microbiological methodology | Molecular methodology | N    | <i>E. coli</i> prevalence | <i>mcr</i> genes |
|-----------------------------------------------|---------|-----------------------------|-----------------------|------|---------------------------|------------------|
| <a href="#">Poirel, et al. (2018) [233]</a>   | AFRICA  | BMD/MIC                     | PCR                   | 50   | 30                        | 1                |
| <a href="#">Coetzee, et al. (2016) [234]</a>  | AFRICA  | BMD/MIC                     | PCR                   | 523  | 78                        | 19               |
| <a href="#">Muktan, et al [235]</a>           | AFRICA  | BMD/MIC                     | PCR                   | 705  | 56                        | 11               |
| <a href="#">El-Mokhtar, et al</a>             | AFRICA  | BMD/MIC                     | PCR                   | 2340 | 140                       | 21               |
| <a href="#">Saavedra, et al. (2017) [236]</a> | AMERICA | BMD/MIC                     | PCR                   | 5887 | 513                       | 8                |
| <a href="#">Walkty, et al. (2016) [237]</a>   | AMERICA | BMD/MIC                     | PCR                   | 5571 | 5571                      | 2                |
| <a href="#">Faccione, et al [238]</a>         | AMERICA | BMD/MIC                     | PCR                   | 192  | 192                       | 192              |
| <a href="#">Rocha, et al [239]</a>            | AMERICA | BMD/MIC                     | PCR                   | 100  | 22                        | 2                |
| <a href="#">Li, Ke, et al. (2018) [240]</a>   | ASIA    | BMD/MIC                     | PCR                   | 123  | 123                       | 6                |

|                                                     |      |         |                  |       |      |     |
|-----------------------------------------------------|------|---------|------------------|-------|------|-----|
| <a href="#">Feng, Shen, et al. (2018) [241]</a>     | ASIA | BMD/MIC | PCR              | 349   | 349  | 88  |
| <a href="#">Lai, Lin, et al. (2018)</a>             | ASIA | BMD/MIC | PCR              | 1359  | 686  | 6   |
| <a href="#">Yoon, et al. (2018) [242]</a>           | ASIA | BMD/MIC | PCR              | 9396  | 2659 | 2   |
| <a href="#">Lu, Wang, Dong, et al. (2018) [243]</a> | ASIA | BMD/MIC | PCR              | 3434  | 3434 | 12  |
| <a href="#">Shen, Wu, et al. (2018) [244]</a>       | ASIA | BMD/MIC | PCR / sequencing | 80    | 80   | 63  |
| <a href="#">Eiamphungporn, et al. (2018) [245]</a>  | ASIA | BMD/MIC | PCR / sequencing | 317   | 37   | 11  |
| <a href="#">Zhong, Phan, et al. (2018) [246]</a>    | ASIA | BMD/MIC | PCR / sequencing | 8022  | 173  | 70  |
| <a href="#">Manohar, et al. (2017) [247]</a>        | ASIA | BMD/MIC | PCR              | 89    | 43   | 11  |
| <a href="#">Wang, Sun, et al. (2017) [248]</a>      | ASIA | BMD/MIC | PCR              | 200   | 200  | 10  |
| <a href="#">Wang, Tian, et al. (2017) [249]</a>     | ASIA | BMD/MIC | PCR / sequencing | 17498 | 9454 | 120 |
| <a href="#">Quan, et al. (2017) [250]</a>           | ASIA | BMD/MIC | PCR / sequencing | 2066  | 1495 | 20  |
| <a href="#">Kim, et al. (2017) [251]</a>            | ASIA | BMD/MIC | PCR              | 1193  | 1193 | 1   |
| <a href="#">Yu, et al. (2016) [252]</a>             | ASIA | BMD/MIC | PCR              | 264   | 36   | 3   |
| <a href="#">Zhong, et al. (2019) [253]</a>          | ASIA | BMD/MIC | PCR              | 144   | 144  | 3   |
| <a href="#">Lee, et al. (2019) [254]</a>            | ASIA | BMD/MIC | PCR              | 1184  | 398  | 1   |
| <a href="#">La, Lee, et al. (2019) [255]</a>        | ASIA | BMD/MIC | PCR              | 201   | 17   | 12  |
| <a href="#">Hsueh, et al [256]</a>                  | ASIA | BMD/MIC | PCR              | 291   | 291  | 2   |

|                                                   |         |         |     |       |       |    |
|---------------------------------------------------|---------|---------|-----|-------|-------|----|
| <a href="#">Velasco, et al [257]</a>              | ASIA    | BMD/MIC | PCR | 123   | 2     | 2  |
| <a href="#">Huang, et al [258]</a>                | ASIA    | BMD/MIC | PCR | 1868  | 376   | 14 |
| <a href="#">Javed, et al</a>                      | ASIA    | BMD/MIC | PCR | 38500 | 2219  | 3  |
| <a href="#">Jiang, et al [259]</a>                | ASIA    | BMD/MIC | PCR | 6401  | 3598  | 17 |
| <a href="#">Palani, et al [260]</a>               | ASIA    | BMD/MIC | PCR | 65    | 3     | 3  |
| <a href="#">Lalaoui, et al. (2019) [261]</a>      | EUROPA  | BMD/MIC | PCR | 217   | 4     | 4  |
| <a href="#">Bourrel, et al. (2019) [262]</a>      | EUROPA  | BMD/MIC | PCR | 1217  | 165   | 7  |
| <a href="#">Prim, et al. (2017) [263]</a>         | EUROPA  | BMD/MIC | PCR | 13579 | 76    | 15 |
| <a href="#">Juhasz, et al. (2017) [264]</a>       | EUROPA  | BMD/MIC | PCR | 504   | 86    | 1  |
| <a href="#">Huang, et al. (2017) [265]</a>        | EUROPA  | BMD/MIC | PCR | 1991  | 1276  | 1  |
| <a href="#">Prim, Rivera, et al. (2016) [266]</a> | EUROPA  | BMD/MIC | PCR | 10011 | 10011 | 7  |
| <a href="#">Mariani, Corbella. (2019) [267]</a>   | EUROPA  | BMD/MIC | PCR | 1557  | 1557  | 14 |
| <a href="#">Nabti, et al. (2019) [268]</a>        | EUROPA  | BMD/MIC | PCR | 237   | 237   | 1  |
| <a href="#">Lellouche, et al (2019) [269]</a>     | EUROPA  | BMD/MIC | PCR | 364   | 44    | 40 |
| <a href="#">Mariani, et al [270]</a>              | EUROPA  | BMD/MIC | PCR | 1557  | 1557  | 11 |
| <a href="#">Janssen, et al [271]</a>              | EUROPA  | BMD/MIC | PCR | 428   | 10    | 10 |
| <a href="#">Wise, et al (2018) [272]</a>          | MUNDIAL | BMD/MIC | PCR | 44407 | 64    | 27 |

|                                                  |         |                      |                     |       |      |    |
|--------------------------------------------------|---------|----------------------|---------------------|-------|------|----|
| <a href="#">Ellem, et al. (2017) [273]</a>       | OCEANIA | BMD/MIC              | PCR                 | 4555  | 18   | 2  |
| <a href="#">Lalaoui, et al. (2019)</a>           | EUROPA  | disk diffusion       | PCR                 | 802   | 217  | 5  |
| <a href="#">Zafer, et al. (2019) [274]</a>       | AFRICA  | agar dilution/MIC    | PCR                 | 450   | 200  | 1  |
| <a href="#">Cao, et al. (2018) [275]</a>         | ASIA    | agar dilution/MIC    | PCR / hybridization | 1112  | 1112 | 6  |
| <a href="#">Farzana, et al. (2019) [276]</a>     | ASIA    | agar dilution/MIC    | PCR                 | 700   | 700  | 1  |
| <a href="#">Mohsin, et al. (2018) [277]</a>      | ASIA    | E-test               | PCR                 | 22    | 2    | 1  |
| <a href="#">San, et al. (2019) [278]</a>         | EUROPA  | E-test               | PCR                 | 1555  | 442  | 1  |
| <a href="#">Henig, et al. (2019) [279]</a>       | AMERICA | Sensititre™ / Vitek2 | PCR                 | 15894 | 45   | 36 |
| <a href="#">Chan, et al. (2018) [280]</a>        | ASIA    | Vitek-2              | PCR                 | 672   | 69   | 14 |
| <a href="#">Li, Sun, et al. (2018) [281]</a>     | ASIA    | Vitek-2              | PCR                 | 7249  | 229  | 1  |
| <a href="#">Luo, et al. (2017) [282]</a>         | ASIA    | Vitek-2              | PCR / sequencing    | 1270  | 1270 | 21 |
| <a href="#">He, Xu, et al. (2017) [283]</a>      | ASIA    | Vitek-2              | PCR / sequencing    | 700   | 700  | 4  |
| <a href="#">Nijhuis, et al. (2016) [284]</a>     | EUROPA  | Vitek-2              | PCR                 | 45    | 18   | 2  |
| <a href="#">Principe, et al. (2018) [285]</a>    | EUROPA  | Vitek-2              | PCR                 | 3902  | 3902 | 10 |
| <a href="#">Newton Foot, et al. (2017) [286]</a> | AFRICA  | Vitek-2 / E-test     | PCR                 | 21    | 14   | 10 |

BMD: Broth Micro-dilution; MIC: Minimum Inhibitory Concentration; PCR: Polymerase Chain Reaction; CR *E. coli*: Colistin-Resistant *E. coli*; \*Studies including other hosts but also healthy humans. The table shows the data only for isolates from humans.



Table S5. Prevalences of *mcr* genes in different continents distributed in the selected studies according of data categories

| Data Categories          | Asia                        |                    | The Americas                |                          | Africa                      |                   | Europe                      |                  |
|--------------------------|-----------------------------|--------------------|-----------------------------|--------------------------|-----------------------------|-------------------|-----------------------------|------------------|
|                          | % <i>mcr</i> Prevalence (n) | IC 95%             | % <i>mcr</i> Prevalence (n) | IC 95%                   | % <i>mcr</i> Prevalence (n) | IC 95%            | % <i>mcr</i> Prevalence (n) | IC 95%           |
| <b>Comunnity studies</b> | <b>14,69 (11375/77459)</b>  | <b>17,56-18,44</b> | <b>21,16 (418/1975)</b>     | <b>18,79-51,37-23,53</b> | <b>9,86 (237/2403)</b>      | <b>9,30-12,12</b> | <b>3,29 (2971/90303)</b>    | <b>5,42-5,82</b> |
| Healthy humans           | 8,3(481/5824)               | 5,0-7,40           | 59,8 (131/219)              | 68,43                    | 9,0 (22/245)                | 3,93-12,67        | 0,9 (155/17222)             | 0,80-1,20        |
| pigs                     | 12,7 (5054/39940)           | 18,71-20,29        | 7,8 (44/561)                | 4,88-10,72               | 5,2 (26/499)                | 5,34-10,46        | 5,0 (1965/39595)            | 9,81-10,59       |
| chickens                 | 18,4(5840/31695)            | 17,64-18,76        | 20,3 (243/1195)             | 17,30-23,30              | 11,4 (189/1659)             | 10,21-13,79       | 2,5 (851/33486)             | 2,38-2,82        |
| <b>Clinical studies</b>  | <b>1,54 (735/47611)</b>     | <b>1,39-1,69</b>   | <b>3,59 (436/12128)</b>     | <b>6,96-8,20</b>         | <b>7,58 (53/699)</b>        | <b>0-1,22</b>     | <b>0,52 (144/27600)</b>     | <b>1,36-1,74</b> |
| Blood                    | 1,0 (116/11894)             | 0,76-1,24          | 3,4 (194/5763)              | 2,79-4,01                | -                           | -                 | 0,3 (53/17123)              | 0,19-0,41        |
| feces                    | 2,2 (416/18724)             | 1,92-2,48          | -                           | -                        | 3,3 (1/30)                  | 0-11,70           | 5,7 (19/336)                | 2,44-8,96        |
| urine                    | 1,8 (132/7412)              | 1,40-2,20          | 4 (232/5830)                | 3,34-4,66                | 9,1 (30/329)                | 5,02-13,18        | 0,1 (7/10011)               | 0,02-0,18        |
| body fluids              | 0,02 (2/8510)               | 0,0-0,06           | -                           | -                        | 6,5 (22/340)                | 3,06-9,94         | 100 (10/10)                 | 100-100          |
| respiratory              | 78,8 (63/80)                | 67,03-90,57        | 9,1 (2/22)                  | 1-24,90                  | -                           | -                 | -                           | -                |
| Others Samples           | 0,6 (6/991)                 | 0,0-1,23           | 1,6(8/513)                  | 0,17-3,03                | -                           | -                 | 45,8 (55/120)               | 34,08-57,52      |

(n)= Number of *E. coli* isolates positive for *mcr* genes based on molecular methods / number of total of isolates of *E. coli*
